# Supplementary material for: One-pot synthesis of the amine-modified meso-structured monolith CO2 adsorbent
Source: Royal Society of Chemistry journal article supplement (doi:10.1039/b920027d), 2010-01-01
Supplement: b920027d.pdf [file b920027d.pdf]

**The textural properties of as-made TS samples, and the XRD patterns, nitrogen adsorption-desorption isotherms, pore size distributions of calcined TS<sub>n</sub> samples**

**Table S1** The textural properties of as-made TS samples.

| Sample                                            | TS0.6 | TS1.2 | TS1.6 | TS2.2 | TS2.8 |
|---------------------------------------------------|-------|-------|-------|-------|-------|
| $S_{\text{BET}}$ ( $\text{m}^2 \text{g}^{-1}$ )   | 7.4   | 7.9   | 7.6   | 4.5   | 5.1   |
| $V_{\text{pore}}$ ( $\text{cm}^3 \text{g}^{-1}$ ) | 0.04  | 0.02  | 0.03  | 0.02  | 0.03  |

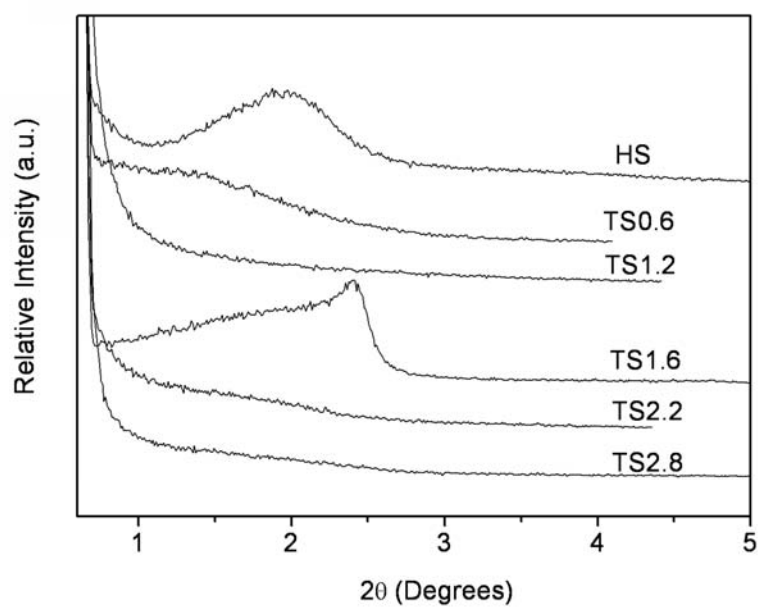

Figure S1. Low angle XRD patterns of calcined HS and TS<sub>n</sub> samples.

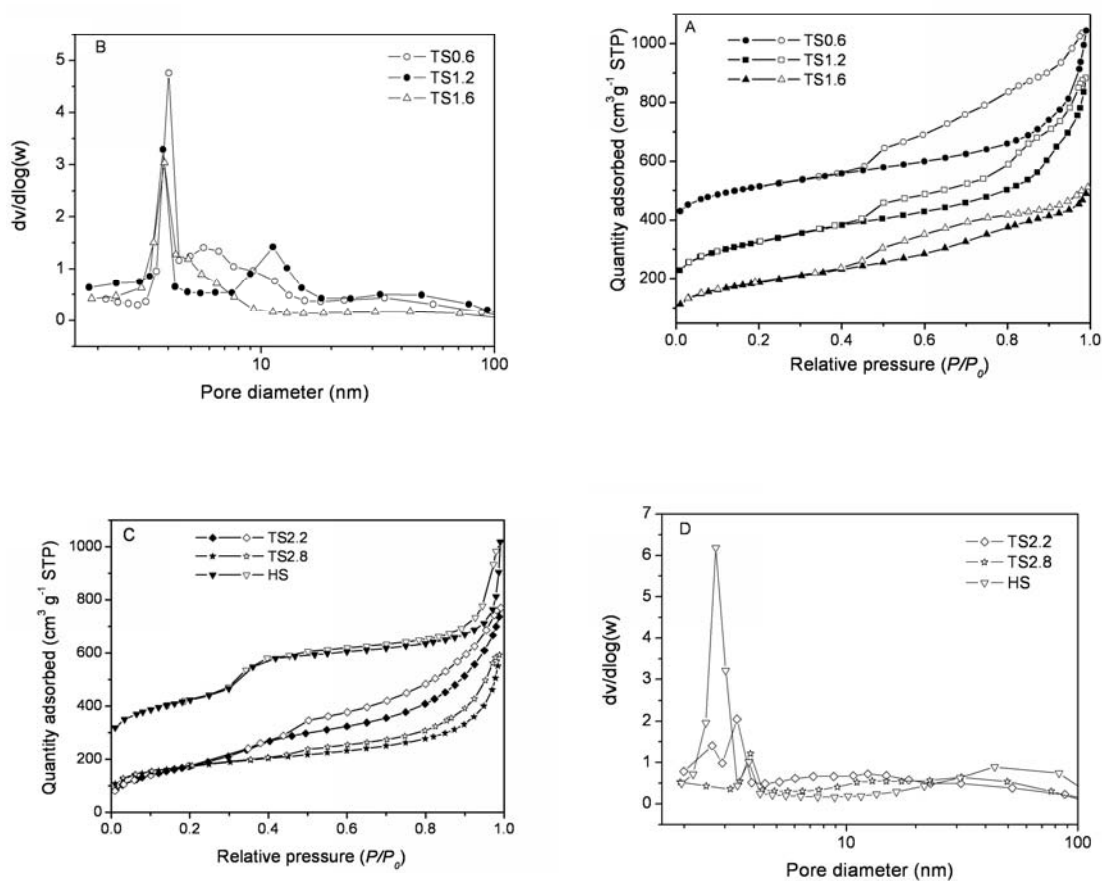

Figure S2. (A, C) N<sub>2</sub> adsorption-desorption isotherms and (B, D) pore size distribution of calcined HS and TS<sub>n</sub> samples. The isotherms of TS0.6, TS1.2 and HS samples were offset vertically by 300, 100 and 200 cm<sup>3</sup> g<sup>-1</sup>, respectively.
